# Supplementary material for: Modeling and computations of the intramolecular electron transfer process in the two-heme protein cytochrome c4
Source: Royal Society of Chemistry journal article supplement (doi:10.1039/c2cp24084j), 2012-01-01
Supplement: c2cp24084j.pdf [file c2cp24084j.pdf]

## Supporting Information

# Modeling and Computations of the Intramolecular Electron Transfer process in the Two-Heme Protein Cytochrome $c_4$

Renat R. Nazmutdinov,<sup>a</sup> Michael D. Bronshtein,<sup>a</sup> Tamara T. Zinkicheva,<sup>a</sup>  
Qijin Chi,<sup>\* b</sup> Jingdong Zhang,<sup>b</sup> and Jens Ulstrup<sup>\* b</sup>

<sup>a</sup> Kazan National Research Technological University, 420015 Kazan, Republic Tatarstan, Russian Federation.

<sup>b</sup> Department of Chemistry, Technical University of Denmark, DK-2800, Lyngby, Denmark.

(\* Corresponding authors. E-mail: [ju@kemi.dtu.dk](mailto:ju@kemi.dtu.dk); [cq@kemi.dtu.dk](mailto:cq@kemi.dtu.dk).)

This supporting information includes 3 Figures and 7 Tables for the details: the potential energy surfaces of the cyt  $c_4$  heme group vs. the rotation angle of methionine and histidine ligands; Optimized structure of cyt  $c_4$  heme group (ox., low spin state) with four water molecules; Selected virtual orbitals of cyt  $c_4$  (Red) as possible candidates for bridge-assisted ET; Table of Parameters of the Kihara potential; Tables of Cartesian coordinates (Å) and the atomic ChelpG charges describing the optimized cyt  $c_4$  heme group structures; Table of calculated vibrational frequencies of selected calculated Raman bands.

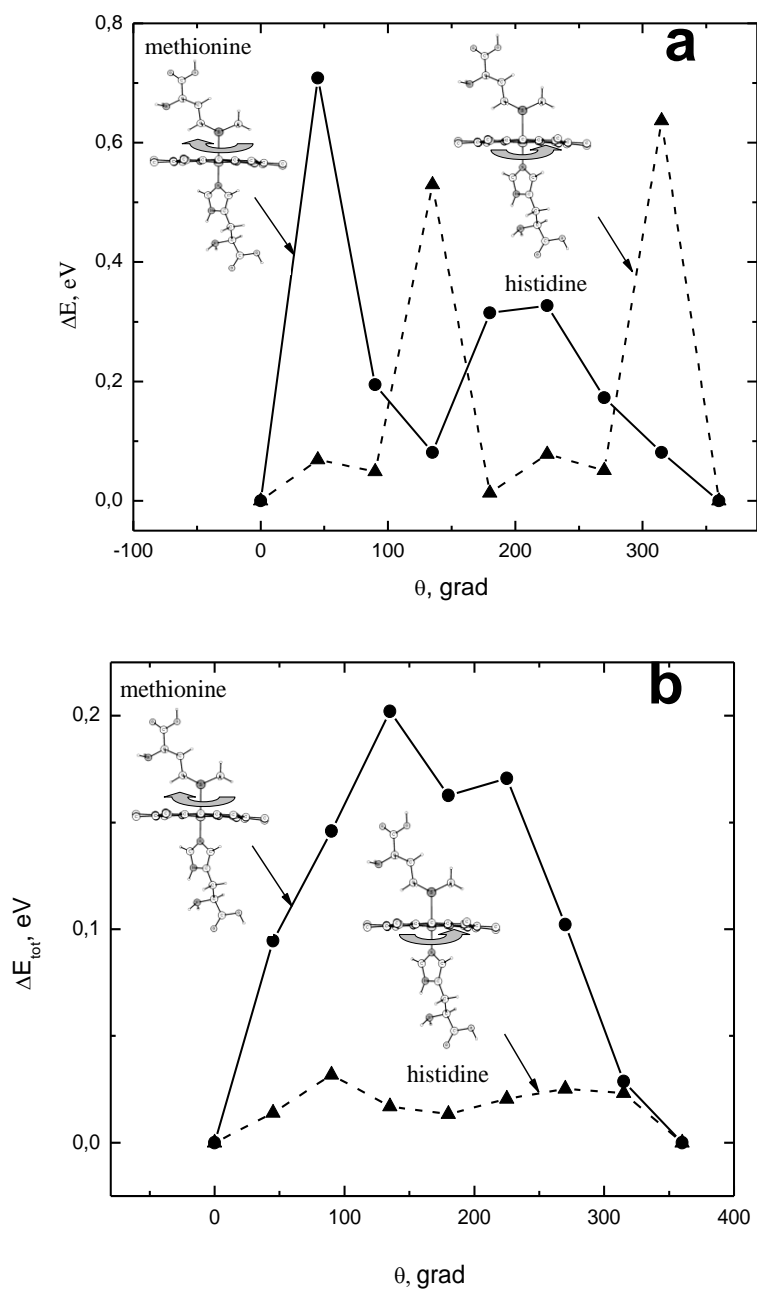

**Figure S1.** Potential energy surfaces of the cyt  $c_4$  heme group vs. the rotation angle of methionine and histidine ligands relative to the heme ring calculated for a low spin oxidized (**a**) and singlet reduced (**b**) states. The total energies of fully optimized structures are taken as reference point.

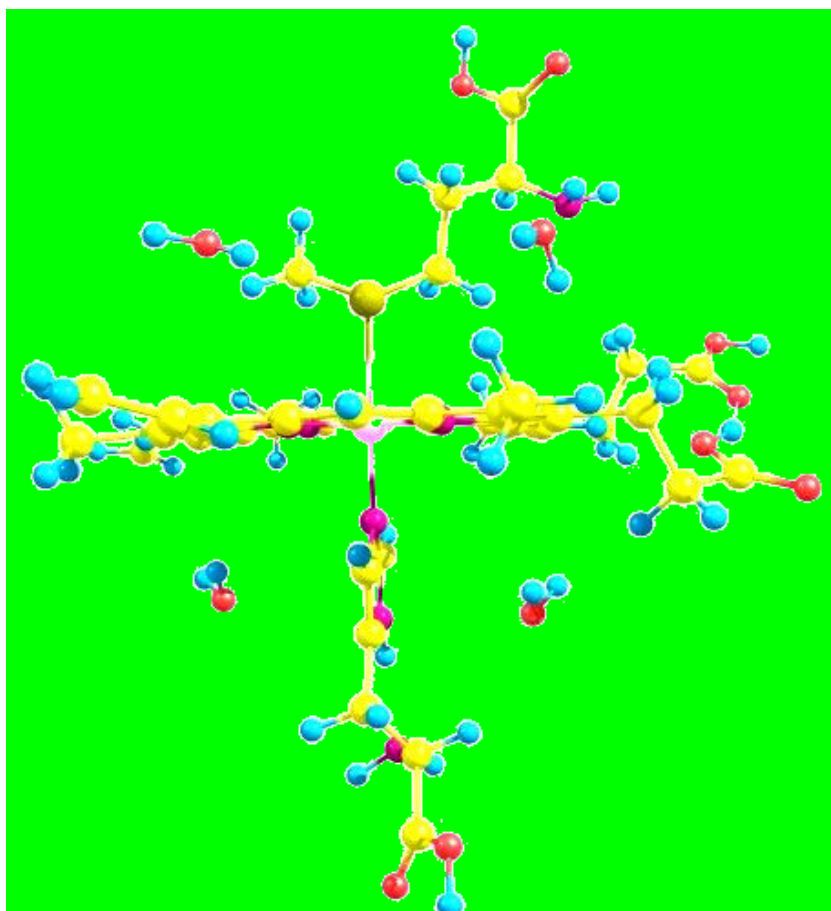

**Figure S2.** Optimized structure of cyt  $c_4$  heme group in its oxidized and low spin state associating with four  $\text{H}_2\text{O}$  molecules.

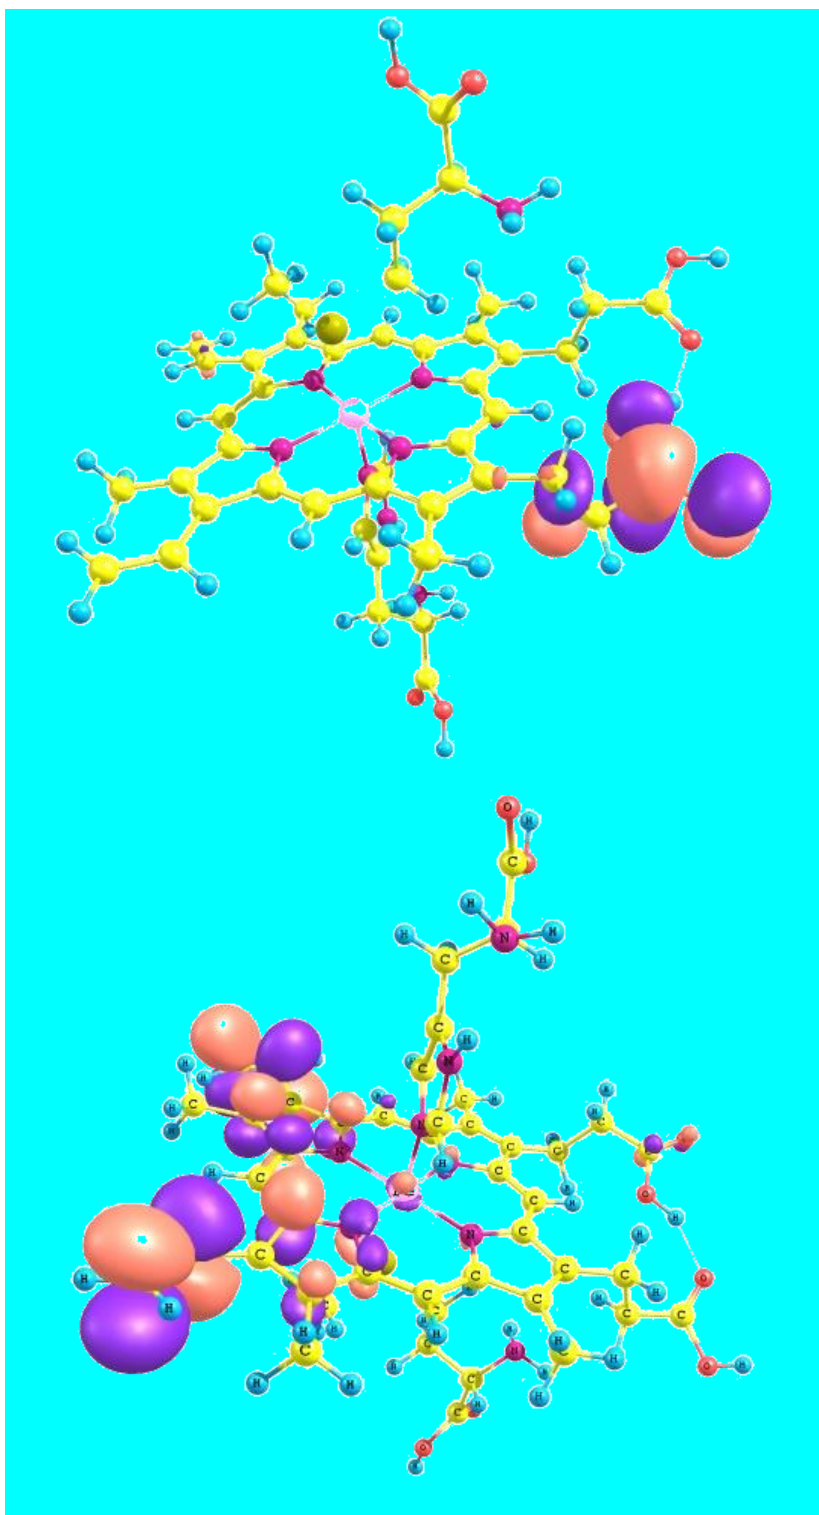

**Figure 3.** Selected virtual orbitals of *cyt c<sub>4</sub>* (reduced form) as possible candidates for bridge assisted ET.

**Table S1.** The parameters of the Kihara potential, eq.(14) calculated using the data at the website [http://lrb.jinr.ru/kafedra/html/for\\_students/for\\_students.shtml](http://lrb.jinr.ru/kafedra/html/for_students/for_students.shtml) (V. A. Osipov, *Workbook on biophysics*).

| atom pair <sup>&amp;</sup> | $\varepsilon$ 100 (eV) | $\sigma$ (Å) |
|----------------------------|------------------------|--------------|
| HH                         | 0.533                  | 2.4          |
| CC                         | 0.521                  | 3.4          |
| NN                         | 0.89                   | 3.1          |
| OO                         | 1.01                   | 3.04         |
| SS                         | 3.                     | 3.6          |

<sup>&</sup>As the contribution of the Fe atoms to the non-Coulomb term is rather minor, we did not include them in the calculations.

**Table S2.** Cartesian coordinates (Å) and the atomic ChelpG charges describing the optimized structure of cyt *c*<sub>4</sub> heme group in the oxidized state ( $m_s = 2$ ).

| atom | <i>x</i> | <i>y</i> | <i>z</i> | <i>q</i>  |
|------|----------|----------|----------|-----------|
| c    | -2.39749 | 1.08212  | -2.19558 | -0.184238 |
| h    | -1.81076 | -0.10895 | -5.25444 | 0.073140  |
| c    | -2.59422 | -0.13918 | -4.48534 | -0.215450 |
| c    | -0.30186 | -1.71893 | -3.11164 | -0.261418 |
| c    | -0.96693 | -0.66598 | -2.49012 | 0.205673  |
| h    | 4.89632  | -3.4925  | 5.06722  | 0.172190  |
| c    | 4.09561  | -5.28274 | -3.80151 | -0.361568 |
| c    | 3.63952  | -4.79538 | -2.6206  | -0.107028 |
| c    | 2.43457  | -3.00016 | -1.2028  | 0.018988  |
| c    | 3.09861  | -2.42666 | 1.11484  | 0.042787  |
| fe   | 0.73553  | -0.8038  | 0.06773  | 0.948618  |
| n    | 2.09272  | -1.49757 | 1.38294  | -0.044899 |
| n    | 0.05674  | 0.45878  | 1.47443  | -0.234181 |
| n    | -0.68616 | -0.18032 | -1.21152 | -0.361196 |
| n    | 1.33335  | -2.15616 | -1.30511 | -0.235760 |
| c    | 3.26787  | -3.10446 | -0.09109 | -0.183508 |
| h    | 4.10258  | -3.79126 | -0.15672 | 0.135758  |
| c    | 2.58578  | -3.79713 | -2.42288 | 0.054492  |
| h    | 4.10578  | -5.18243 | -1.71458 | 0.127353  |
| h    | 4.87899  | -6.03574 | -3.82353 | 0.162101  |
| h    | 3.73063  | -4.93892 | -4.76413 | 0.177847  |
| c    | 1.53743  | -3.43379 | -3.26444 | -0.058112 |
| c    | 1.19461  | -3.99116 | -4.61896 | -0.068976 |
| h    | 0.1328   | -3.86638 | -4.8561  | 0.033094  |
| h    | 1.42026  | -5.06314 | -4.66473 | 0.056718  |
| h    | 1.76942  | -3.50528 | -5.42075 | 0.046243  |
| c    | 0.78439  | -2.40499 | -2.5671  | 0.170954  |
| c    | 2.27346  | -1.11958 | 2.71112  | -0.005443 |
| c    | 3.93113  | -2.6378  | 2.29151  | -0.050596 |

|   |          |          |          |           |
|---|----------|----------|----------|-----------|
| c | 5.13549  | -3.53601 | 2.35183  | -0.050467 |
| h | 5.59166  | -3.67695 | 1.3662   | 0.026055  |
| h | 4.88319  | -4.53228 | 2.74328  | 0.060382  |
| h | 5.90004  | -3.11309 | 3.01395  | 0.043641  |
| c | 3.40483  | -1.83602 | 3.30004  | 0.073459  |
| c | 3.85458  | -1.652   | 4.68248  | -0.108865 |
| h | 3.55949  | -0.71663 | 5.15818  | 0.120224  |
| c | 4.5872   | -2.51636 | 5.42744  | -0.354895 |
| h | 4.87273  | -2.26509 | 6.44556  | 0.160806  |
| c | 1.50056  | -0.1733  | 3.38138  | -0.204374 |
| h | 1.71667  | 0.01167  | 4.42668  | 0.148903  |
| c | 0.47714  | 0.56858  | 2.79978  | 0.121227  |
| c | -0.94952 | 1.40841  | 1.32052  | 0.174479  |
| c | -0.28808 | 1.59734  | 3.49824  | 0.010878  |
| c | -1.17315 | 2.12521  | 2.57779  | -0.113701 |
| c | -0.10594 | 1.96043  | 4.94771  | -0.245434 |
| h | -0.27738 | 1.09797  | 5.60576  | 0.077601  |
| h | -0.80245 | 2.74776  | 5.2516   | 0.107034  |
| h | 0.90949  | 2.32842  | 5.14889  | 0.091873  |
| h | -0.62847 | -1.99713 | -4.10702 | 0.151056  |
| c | -2.03559 | 0.10956  | -3.10921 | -0.013688 |
| h | -3.07902 | -1.12283 | -4.55523 | 0.084235  |
| h | -3.34339 | 0.6128   | -4.75292 | 0.096108  |
| c | -1.56006 | 0.88543  | -1.01449 | 0.179938  |
| c | -3.45126 | 2.15207  | -2.33851 | 0.282860  |
| c | -1.68164 | 1.63034  | 0.15709  | -0.243257 |
| h | -2.42297 | 2.42131  | 0.17781  | 0.184741  |
| c | -2.23833 | 3.17414  | 2.78395  | 0.114278  |
| h | -3.19423 | 2.77667  | 2.42338  | -0.021620 |
| h | -2.36626 | 3.36204  | 3.85491  | 0.037436  |
| h | -3.56343 | 2.42434  | -3.39523 | -0.012638 |
| h | -3.14703 | 3.05837  | -1.80607 | -0.079724 |
| c | -4.842   | 1.6959   | -1.79021 | -0.226465 |
| h | -5.23494 | 0.86294  | -2.37847 | 0.085824  |
| h | -4.72863 | 1.35517  | -0.75295 | 0.043084  |
| c | -1.96689 | 4.54282  | 2.0645   | -0.211864 |
| h | -1.17613 | 4.41725  | 1.31421  | 0.035564  |
| h | -1.63267 | 5.30219  | 2.77594  | 0.084040  |
| c | -3.193   | 5.08334  | 1.34325  | 0.798931  |
| o | -3.70767 | 6.19711  | 1.50539  | -0.594342 |
| o | -3.66916 | 4.15392  | 0.43671  | -0.660986 |
| h | -4.48792 | 4.38514  | -0.09039 | 0.521243  |
| c | -5.84422 | 2.82944  | -1.80758 | 0.915286  |
| o | -5.71283 | 3.93618  | -1.24229 | -0.680616 |
| o | -6.9712  | 2.54011  | -2.5361  | -0.750624 |
| h | -7.61215 | 3.28993  | -2.53407 | 0.521685  |
| c | 4.57159  | 4.35693  | -1.44196 | 0.254901  |
| h | 3.58587  | 4.82447  | -1.33341 | 0.044087  |
| c | 5.6274   | 5.40749  | -1.07102 | 0.789166  |
| c | 4.65888  | 3.1598   | -0.4449  | -0.280020 |
| h | 5.65315  | 2.69776  | -0.54421 | 0.107365  |
| h | 4.58221  | 3.54081  | 0.5775   | 0.131570  |

|   |          |          |          |           |
|---|----------|----------|----------|-----------|
| n | 4.72388  | 3.89603  | -2.84352 | -0.775880 |
| h | 5.69916  | 3.6728   | -3.05894 | 0.333497  |
| h | 4.39337  | 4.59158  | -3.51457 | 0.328313  |
| o | 5.34095  | 6.00245  | 0.14104  | -0.766228 |
| h | 6.01388  | 6.67651  | 0.39246  | 0.524656  |
| o | 6.62401  | 5.68602  | -1.74952 | -0.583262 |
| c | 3.58535  | 2.13464  | -0.68204 | 0.210473  |
| n | 3.20009  | 1.77026  | -1.97843 | -0.197639 |
| c | 2.83226  | 1.34462  | 0.16724  | -0.140869 |
| c | 2.24873  | 0.80344  | -1.89965 | 0.198369  |
| h | 1.76455  | 0.3429   | -2.74288 | 0.051867  |
| n | 2.0068   | 0.5198   | -0.60574 | -0.438223 |
| h | 2.8272   | 1.30932  | 1.24274  | 0.100727  |
| h | 3.60472  | 2.28554  | -2.77689 | 0.238293  |
| c | -0.47657 | -4.18438 | 0.47648  | 0.014209  |
| h | 0.56542  | -4.39609 | 0.71994  | 0.061970  |
| h | -0.61933 | -4.19701 | -0.60549 | 0.003686  |
| h | -1.13009 | -4.9064  | 0.97029  | 0.079195  |
| s | -0.85323 | -2.46422 | 1.15053  | -0.435822 |
| c | -2.60001 | -2.19502 | 0.44871  | 0.397841  |
| h | -2.56608 | -2.44868 | -0.61558 | -0.051071 |
| h | -2.79384 | -1.12736 | 0.55147  | -0.019878 |
| c | -3.65377 | -3.01152 | 1.2078   | -0.155854 |
| h | -3.48337 | -4.08739 | 1.0884   | 0.081146  |
| h | -3.59892 | -2.78116 | 2.28122  | 0.071229  |
| c | -5.08564 | -2.68317 | 0.68999  | 0.114069  |
| h | -5.12162 | -2.90378 | -0.38441 | 0.090876  |
| n | -5.41354 | -1.26816 | 0.89396  | -1.004984 |
| c | -6.08799 | -3.62979 | 1.37431  | 0.858375  |
| o | -6.92398 | -3.30341 | 2.22639  | -0.603853 |
| o | -5.94028 | -4.93376 | 0.92788  | -0.796684 |
| h | -6.57689 | -5.54369 | 1.36724  | 0.521624  |
| h | -5.50203 | -1.02525 | 1.88109  | 0.410926  |
| h | -6.24462 | -0.97069 | 0.38499  | 0.398944  |

**Table S3.** Cartesian coordinates (Å) and the atomic ChelpG charges describing the optimized structure of the cyt  $c_4$  heme group in the oxidized state ( $m_s = 4$ ).

| atom | $x$      | $y$      | $z$      | $q$       |
|------|----------|----------|----------|-----------|
| c    | -2.2497  | 1.38996  | -2.07543 | -0.135067 |
| h    | -1.81005 | 0.15403  | -5.15092 | 0.072763  |
| c    | -2.58667 | 0.23133  | -4.37852 | -0.201486 |
| c    | -0.51652 | -1.63484 | -3.02714 | -0.231498 |
| c    | -1.01609 | -0.49772 | -2.40278 | 0.207577  |
| h    | 4.4661   | -4.02271 | 5.15118  | 0.165934  |
| c    | 3.02752  | -6.07253 | -3.58111 | -0.365956 |
| c    | 2.67415  | -5.46722 | -2.41956 | -0.085268 |
| c    | 1.89458  | -3.40924 | -1.0699  | 0.004781  |
| c    | 2.71347  | -2.88284 | 1.20231  | 0.057036  |
| fe   | 0.70925  | -0.84656 | 0.11401  | 0.780685  |
| n    | 1.92909  | -1.7476  | 1.43258  | -0.059715 |
| n    | 0.23959  | 0.52397  | 1.50509  | -0.168893 |
| n    | -0.6697  | -0.05602 | -1.12162 | -0.330551 |
| n    | 1.0021   | -2.34537 | -1.20382 | -0.170301 |
| c    | 2.7009   | -3.64643 | 0.03855  | -0.184783 |
| h    | 3.36722  | -4.49902 | -0.0006  | 0.143850  |
| c    | 1.87243  | -4.25081 | -2.2638  | 0.048227  |
| h    | 3.02029  | -5.93021 | -1.49553 | 0.117663  |
| h    | 3.61731  | -6.98542 | -3.57161 | 0.165092  |
| h    | 2.76954  | -5.6762  | -4.55832 | 0.179228  |
| c    | 0.93976  | -3.68376 | -3.13131 | -0.020470 |
| c    | 0.4991   | -4.18643 | -4.47851 | -0.153122 |
| h    | -0.50731 | -3.83966 | -4.73671 | 0.058708  |
| h    | 0.48755  | -5.28314 | -4.49729 | 0.077054  |
| h    | 1.17671  | -3.85589 | -5.27974 | 0.068573  |
| c    | 0.42001  | -2.50254 | -2.46745 | 0.156761  |
| c    | 2.24575  | -1.33136 | 2.72452  | 0.012401  |
| c    | 3.5368   | -3.18374 | 2.36053  | -0.028027 |
| c    | 4.53247  | -4.3064  | 2.44937  | -0.055011 |
| h    | 4.89538  | -4.61205 | 1.46263  | 0.025541  |
| h    | 4.10197  | -5.19567 | 2.93214  | 0.062421  |
| h    | 5.40329  | -4.00506 | 3.04347  | 0.043157  |
| c    | 3.23726  | -2.2217  | 3.32303  | 0.061064  |
| c    | 3.78629  | -2.04033 | 4.669    | -0.113391 |
| h    | 3.70667  | -1.03567 | 5.08422  | 0.119446  |
| c    | 4.37334  | -2.98282 | 5.44807  | -0.324996 |
| h    | 4.75545  | -2.7266  | 6.43281  | 0.153968  |
| c    | 1.6912   | -0.22798 | 3.36651  | -0.171942 |
| h    | 1.9948   | -0.02731 | 4.38659  | 0.137099  |
| c    | 0.75309  | 0.62693  | 2.79965  | 0.109195  |
| c    | -0.66835 | 1.57811  | 1.38226  | 0.116600  |
| c    | 0.1612   | 1.76096  | 3.49932  | 0.011280  |
| c    | -0.72603 | 2.35279  | 2.61858  | -0.077385 |
| c    | 0.48154  | 2.149    | 4.91746  | -0.241506 |
| h    | 0.20458  | 1.35564  | 5.62481  | 0.077640  |
| h    | -0.05507 | 3.05498  | 5.21398  | 0.106916  |



|   |          |          |          |           |
|---|----------|----------|----------|-----------|
| h | 1.55377  | 2.3464   | 5.05068  | 0.092506  |
| h | -0.88296 | -1.85991 | -4.02185 | 0.136473  |
| c | -1.9932  | 0.39807  | -3.00529 | -0.027370 |
| h | -3.2046  | -0.67483 | -4.44672 | 0.086757  |
| h | -3.22457 | 1.08147  | -4.64058 | 0.090782  |
| c | -1.4267  | 1.09726  | -0.90911 | 0.150055  |
| c | -3.20074 | 2.55519  | -2.19255 | 0.211888  |
| c | -1.43387 | 1.85748  | 0.25626  | -0.167133 |
| h | -2.08769 | 2.7211   | 0.29656  | 0.149654  |
| c | -1.65154 | 3.52176  | 2.85464  | 0.106719  |
| h | -2.66845 | 3.22362  | 2.57509  | -0.018686 |
| h | -1.68232 | 3.7545   | 3.92382  | 0.042590  |
| h | -3.2419  | 2.9003   | -3.23349 | 0.003109  |
| h | -2.84282 | 3.39848  | -1.59551 | -0.062904 |
| c | -4.6441  | 2.18758  | -1.73134 | -0.203485 |
| h | -5.11295 | 1.48713  | -2.42893 | 0.084988  |
| h | -4.6089  | 1.68786  | -0.75184 | 0.045490  |
| c | -1.28125 | 4.82975  | 2.06842  | -0.244618 |
| h | -0.55362 | 4.59617  | 1.28102  | 0.045835  |
| h | -0.82848 | 5.57217  | 2.7304   | 0.091447  |
| c | -2.48386 | 5.47441  | 1.39454  | 0.824877  |
| o | -2.86921 | 6.64062  | 1.54046  | -0.598738 |
| o | -3.10585 | 4.57043  | 0.55257  | -0.658903 |
| h | -3.91797 | 4.86892  | 0.052    | 0.514695  |
| c | -5.53175 | 3.40633  | -1.59487 | 0.913290  |
| o | -5.2296  | 4.48634  | -1.04508 | -0.677736 |
| o | -6.77872 | 3.2184   | -2.13872 | -0.754720 |
| h | -7.35275 | 4.01208  | -2.02267 | 0.522844  |
| c | 5.33672  | 3.7887   | -1.74946 | 0.275430  |
| h | 4.39844  | 4.355    | -1.71226 | 0.032474  |
| c | 6.47695  | 4.75808  | -1.40746 | 0.785107  |
| c | 5.27169  | 2.6634   | -0.67045 | -0.242932 |
| h | 6.21121  | 2.09034  | -0.71037 | 0.093834  |
| h | 5.21701  | 3.12265  | 0.32129  | 0.117743  |
| n | 5.48896  | 3.21547  | -3.10777 | -0.777331 |
| h | 6.4415   | 2.87724  | -3.26673 | 0.329684  |
| h | 5.2536   | 3.88854  | -3.8393  | 0.325900  |
| o | 6.2032   | 5.47314  | -0.25733 | -0.768969 |
| h | 6.93095  | 6.09611  | -0.02669 | 0.524183  |
| o | 7.5237   | 4.88599  | -2.05527 | -0.585407 |
| c | 4.09424  | 1.74922  | -0.86524 | 0.177264  |
| n | 3.70227  | 1.32301  | -2.13893 | -0.177380 |
| c | 3.22493  | 1.12771  | 0.01712  | -0.111461 |
| c | 2.63324  | 0.48511  | -2.00817 | 0.174332  |
| h | 2.11963  | 0.01591  | -2.83063 | 0.054029  |
| n | 2.32071  | 0.3417   | -0.70808 | -0.449888 |
| h | 3.18712  | 1.19037  | 1.09227  | 0.090514  |
| h | 4.18018  | 1.71042  | -2.965   | 0.228188  |
| c | -1.28198 | -4.1869  | 0.72326  | 0.042286  |
| h | -0.32228 | -4.5577  | 1.0893   | 0.064367  |
| h | -1.27792 | -4.16804 | -0.3692  | -0.009948 |
| h | -2.08999 | -4.81755 | 1.0999   | 0.056077  |

|   |          |          |          |           |
|---|----------|----------|----------|-----------|
| s | -1.46507 | -2.43034 | 1.38461  | -0.471563 |
| c | -3.06289 | -1.89718 | 0.50755  | 0.408434  |
| h | -2.95749 | -2.15985 | -0.55145 | -0.064289 |
| h | -3.08891 | -0.80941 | 0.59414  | -0.011116 |
| c | -4.32149 | -2.52319 | 1.12336  | -0.168747 |
| h | -4.29335 | -3.61532 | 1.03614  | 0.086276  |
| h | -4.3715  | -2.27763 | 2.19375  | 0.065605  |
| c | -5.61202 | -2.00911 | 0.42022  | 0.121110  |
| h | -5.52904 | -2.22577 | -0.65277 | 0.084636  |
| n | -5.7762  | -0.5601  | 0.60037  | -0.988456 |
| c | -6.81644 | -2.80954 | 0.94574  | 0.854757  |
| o | -7.70715 | -2.37437 | 1.68819  | -0.606469 |
| o | -6.79165 | -4.12039 | 0.49365  | -0.795319 |
| h | -7.55574 | -4.63827 | 0.83913  | 0.520008  |
| h | -5.91585 | -0.30713 | 1.57992  | 0.405383  |
| h | -6.53118 | -0.17327 | 0.03436  | 0.390654  |

**Table S4.** Cartesian coordinates (Å) and the atomic ChelpG charges describing the optimized structure of deprotonated (dp) cyt  $c_4$  heme group in the oxidized state ( $m_s = 2$ ).

| atom | $x$      | $y$      | $z$      | $q$       |
|------|----------|----------|----------|-----------|
| c    | -0.037   | 3.40639  | 2.51728  | -0.188174 |
| h    | -0.66035 | 2.12155  | 5.52095  | 0.064701  |
| c    | 0.15194  | 2.64597  | 4.99818  | -0.249533 |
| c    | 0.1429   | -0.07428 | 3.49171  | -0.238920 |
| c    | 0.11821  | 1.15324  | 2.83478  | 0.163577  |
| h    | 0.98785  | -4.88195 | -5.06277 | 0.172958  |
| c    | -0.7221  | -5.71176 | 3.81936  | -0.390987 |
| c    | -0.34976 | -5.01623 | 2.71461  | -0.077490 |
| c    | -0.16    | -2.87373 | 1.28543  | 0.016739  |
| c    | -0.06447 | -2.89038 | -1.19406 | 0.025943  |
| fe   | 0.03209  | -0.09908 | 0.03009  | 1.040443  |
| n    | 0.09562  | -1.52007 | -1.39553 | -0.069916 |
| n    | 0.17194  | 1.29746  | -1.39613 | -0.257675 |
| n    | 0.05598  | 1.31874  | 1.45003  | -0.308953 |
| n    | -0.00758 | -1.50531 | 1.47617  | -0.232885 |
| c    | -0.21498 | -3.51091 | 0.04589  | -0.191202 |
| h    | -0.34343 | -4.58666 | 0.04337  | 0.128903  |
| c    | -0.20668 | -3.56677 | 2.57502  | 0.026283  |
| h    | -0.13356 | -5.60064 | 1.8199   | 0.120131  |
| h    | -0.77984 | -6.79701 | 3.79529  | 0.151218  |
| h    | -0.99674 | -5.23471 | 4.75438  | 0.181941  |
| c    | -0.05174 | -2.58831 | 3.55502  | -0.039123 |
| c    | 0.02776  | -2.76941 | 5.0465   | -0.049025 |
| h    | 0.52018  | -1.9219  | 5.53491  | 0.028315  |
| h    | 0.59578  | -3.67363 | 5.29779  | 0.041156  |
| h    | -0.96849 | -2.87568 | 5.50075  | 0.033455  |
| c    | 0.05111  | -1.3176  | 2.85959  | 0.119092  |
| c    | 0.28193  | -1.35487 | -2.76336 | 0.006500  |
| c    | 0.01248  | -3.60579 | -2.45971 | -0.044856 |
| c    | -0.16508 | -5.08953 | -2.6298  | -0.003408 |
| h    | -0.74476 | -5.52823 | -1.81042 | 0.011259  |
| h    | 0.80066  | -5.61524 | -2.66838 | 0.040247  |
| h    | -0.69215 | -5.31105 | -3.56571 | 0.022528  |
| c    | 0.25568  | -2.65115 | -3.44297 | 0.047849  |
| c    | 0.42667  | -2.81356 | -4.88729 | -0.094459 |
| h    | 0.26966  | -1.91572 | -5.48586 | 0.120823  |
| c    | 0.76582  | -3.94282 | -5.55915 | -0.378000 |
| h    | 0.85508  | -3.93548 | -6.64232 | 0.151551  |
| c    | 0.43291  | -0.12377 | -3.40247 | -0.235065 |
| h    | 0.59359  | -0.11969 | -4.4743  | 0.147111  |
| c    | 0.35307  | 1.11247  | -2.76648 | 0.143416  |
| c    | 0.06941  | 2.67496  | -1.21666 | 0.208565  |
| c    | 0.39019  | 2.39765  | -3.45774 | -0.007001 |
| c    | 0.1984   | 3.3738   | -2.49769 | -0.102819 |
| c    | 0.59752  | 2.56386  | -4.93933 | -0.231465 |
| h    | 1.56783  | 2.15992  | -5.26046 | 0.068784  |
| h    | 0.57056  | 3.62053  | -5.22218 | 0.099324  |

|   |          |          |          |           |
|---|----------|----------|----------|-----------|
| h | -0.18049 | 2.04879  | -5.52024 | 0.078967  |
| h | 0.18335  | -0.05767 | 4.57521  | 0.146180  |
| c | 0.07988  | 2.44844  | 3.50738  | 0.026145  |
| h | 1.09949  | 2.27319  | 5.41205  | 0.084923  |
| h | 0.07947  | 3.70694  | 5.25652  | 0.110369  |
| c | -0.04161 | 2.69097  | 1.24249  | 0.166317  |
| c | -0.11034 | 4.90521  | 2.65077  | 0.281580  |
| c | -0.06931 | 3.32911  | 0.00392  | -0.255035 |
| h | -0.15258 | 4.41822  | -0.0155  | 0.213278  |
| c | 0.16257  | 4.87213  | -2.64859 | 0.094472  |
| h | 0.89272  | 5.31671  | -1.96112 | -0.022528 |
| h | 0.4751   | 5.14144  | -3.66406 | 0.036898  |
| h | -0.41513 | 5.1738   | 3.66929  | -0.008887 |
| h | -0.86271 | 5.30855  | 1.96494  | -0.067859 |
| c | 1.25245  | 5.60109  | 2.33925  | -0.254406 |
| h | 2.02631  | 5.21532  | 3.0113   | 0.048739  |
| h | 1.52999  | 5.38521  | 1.30119  | 0.056357  |
| c | -1.22351 | 5.53441  | -2.34189 | -0.208185 |
| h | -1.92469 | 4.77723  | -1.96304 | 0.010916  |
| h | -1.66737 | 5.95722  | -3.24791 | 0.061306  |
| c | -1.15918 | 6.66139  | -1.27963 | 0.792688  |
| o | -1.8396  | 7.70919  | -1.44444 | -0.686764 |
| o | -0.38275 | 6.38458  | -0.23414 | -0.680331 |
| h | 0.01701  | 7.2474   | 0.80433  | 0.510783  |
| c | 1.15475  | 7.11565  | 2.5322   | 0.853147  |
| o | 0.42048  | 7.79448  | 1.64829  | -0.769354 |
| o | 1.73364  | 7.68171  | 3.51365  | -0.675626 |
| c | -6.27437 | 1.31989  | -1.04471 | 0.283170  |
| h | -5.74282 | 2.2784   | -1.05801 | 0.048338  |
| c | -7.49278 | 1.44866  | -1.96733 | 0.772004  |
| c | -5.31542 | 0.22337  | -1.60766 | -0.241152 |
| h | -5.84509 | -0.74175 | -1.59049 | 0.088425  |
| h | -5.08742 | 0.45097  | -2.65313 | 0.118894  |
| n | -6.67327 | 1.01607  | 0.3496   | -0.780440 |
| h | -7.39687 | 0.29434  | 0.38314  | 0.327849  |
| h | -7.00384 | 1.8441   | 0.84668  | 0.324746  |
| o | -7.14845 | 1.99659  | -3.18633 | -0.765937 |
| h | -7.92514 | 2.08582  | -3.78525 | 0.523552  |
| o | -8.64587 | 1.09207  | -1.68531 | -0.590453 |
| c | -4.03606 | 0.13666  | -0.82617 | 0.180118  |
| n | -4.03279 | 0.18922  | 0.57341  | -0.208882 |
| c | -2.71146 | -0.00934 | -1.19726 | -0.104854 |
| c | -2.74796 | 0.08974  | 1.01203  | 0.219521  |
| h | -2.44298 | 0.12509  | 2.04356  | 0.043154  |
| n | -1.92389 | -0.03556 | -0.04226 | -0.491458 |
| h | -2.27968 | -0.08434 | -2.18075 | 0.091771  |
| h | -4.91113 | 0.38757  | 1.06919  | 0.242386  |
| c | 3.21083  | -1.42055 | 1.15961  | 0.013047  |
| h | 2.78681  | -2.3865  | 0.8784   | 0.060277  |
| h | 2.88261  | -1.14774 | 2.16462  | -0.010156 |
| h | 4.30059  | -1.45433 | 1.09494  | 0.078043  |
| s | 2.56697  | -0.1618  | -0.08972 | -0.460834 |

|   |         |         |          |           |
|---|---------|---------|----------|-----------|
| c | 3.18138 | 1.45669 | 0.69186  | 0.478860  |
| h | 2.85553 | 1.45203 | 1.73711  | -0.059505 |
| h | 2.65557 | 2.24973 | 0.15761  | -0.075952 |
| c | 4.69515 | 1.65362 | 0.56225  | -0.181541 |
| h | 5.24873 | 0.9002  | 1.13635  | 0.059100  |
| h | 4.99502 | 1.57182 | -0.49189 | 0.070215  |
| c | 5.07802 | 3.07672 | 1.08679  | 0.212491  |
| h | 4.71996 | 3.16309 | 2.12082  | 0.055112  |
| n | 4.46052 | 4.12657 | 0.2803   | -0.993917 |
| c | 6.60813 | 3.18713 | 1.13333  | 0.830194  |
| o | 7.31662 | 3.85429 | 0.36696  | -0.603817 |
| o | 7.14731 | 2.40615 | 2.1495   | -0.791996 |
| h | 8.12903 | 2.47927 | 2.17134  | 0.512536  |
| h | 4.9507  | 4.32856 | -0.58768 | 0.398505  |
| h | 4.20723 | 4.97119 | 0.78443  | 0.392640  |

**Table S5.** Cartesian coordinates (Å) and the atomic ChelpG charges describing the optimized structure of cyt  $c_4$  heme group in the reduced state ( $m_s = 1$ ).

| atom | $x$      | $y$      | $z$      | $q$       |
|------|----------|----------|----------|-----------|
| c    | -2.42175 | 1.02995  | -2.21764 | -0.229901 |
| h    | -1.79309 | -0.15326 | -5.27005 | 0.070186  |
| c    | -2.58145 | -0.20178 | -4.50567 | -0.242189 |
| c    | -0.27201 | -1.74955 | -3.09801 | -0.260104 |
| c    | -0.95079 | -0.69048 | -2.4933  | 0.171810  |
| h    | 5.10381  | -3.25995 | 5.11181  | 0.179660  |
| c    | 3.94749  | -5.58998 | -3.65001 | -0.437832 |
| c    | 3.54696  | -4.97318 | -2.50727 | -0.052250 |
| c    | 2.39916  | -3.09613 | -1.14229 | -0.007388 |
| c    | 3.09479  | -2.4584  | 1.16351  | 0.031418  |
| fe   | 0.7431   | -0.81713 | 0.07322  | 0.719555  |
| n    | 2.13499  | -1.47612 | 1.39349  | -0.006345 |
| n    | 0.09407  | 0.52248  | 1.44489  | -0.169222 |
| n    | -0.68622 | -0.19374 | -1.22048 | -0.284595 |
| n    | 1.34053  | -2.2111  | -1.27727 | -0.136978 |
| c    | 3.21954  | -3.19689 | -0.01601 | -0.211262 |
| h    | 4.02259  | -3.92428 | -0.05253 | 0.138470  |
| c    | 2.53567  | -3.92888 | -2.34818 | -0.001614 |
| h    | 4.03968  | -5.29134 | -1.58759 | 0.110388  |
| h    | 4.70851  | -6.36627 | -3.621   | 0.152407  |
| h    | 3.55651  | -5.33393 | -4.62929 | 0.182851  |
| c    | 1.52142  | -3.53052 | -3.21316 | -0.027346 |
| c    | 1.18485  | -4.09009 | -4.56924 | -0.077042 |
| h    | 0.15939  | -3.84687 | -4.868   | 0.023253  |
| h    | 1.28317  | -5.18341 | -4.57479 | 0.043622  |
| h    | 1.85511  | -3.70234 | -5.35146 | 0.035558  |
| c    | 0.79858  | -2.45727 | -2.53801 | 0.106214  |
| c    | 2.35439  | -1.02628 | 2.68546  | -0.012323 |
| c    | 3.94621  | -2.63599 | 2.33795  | -0.056183 |
| c    | 5.112    | -3.58257 | 2.43455  | 0.020505  |
| h    | 5.49294  | -3.86222 | 1.44628  | 0.000182  |
| h    | 4.84311  | -4.51252 | 2.9583   | 0.026457  |
| h    | 5.93898  | -3.12547 | 2.99291  | 0.007605  |
| c    | 3.47909  | -1.74922 | 3.30128  | 0.012439  |
| c    | 3.96558  | -1.49206 | 4.65628  | -0.052612 |
| h    | 3.64456  | -0.54691 | 5.09654  | 0.106378  |
| c    | 4.75778  | -2.28122 | 5.42803  | -0.427280 |
| h    | 5.05693  | -1.96006 | 6.42304  | 0.149169  |
| c    | 1.61196  | -0.02334 | 3.31737  | -0.215427 |
| h    | 1.86436  | 0.21818  | 4.34439  | 0.138022  |
| c    | 0.5636   | 0.69454  | 2.74083  | 0.088633  |
| c    | -0.93113 | 1.44525  | 1.2897   | 0.147079  |
| c    | -0.19346 | 1.74785  | 3.42997  | 0.022501  |
| c    | -1.12418 | 2.21595  | 2.527    | -0.170525 |
| c    | 0.04023  | 2.17797  | 4.8544   | -0.241175 |
| h    | -0.08782 | 1.34148  | 5.5558   | 0.061527  |
| h    | -0.6574  | 2.96842  | 5.15235  | 0.094720  |

|   |          |          |          |           |
|---|----------|----------|----------|-----------|
| h | 1.05815  | 2.56792  | 4.9978   | 0.080364  |
| h | -0.59205 | -2.03369 | -4.0954  | 0.143533  |
| c | -2.0363  | 0.06467  | -3.12643 | 0.001048  |
| h | -3.03699 | -1.20013 | -4.57672 | 0.079319  |
| h | -3.35071 | 0.52888  | -4.78013 | 0.087881  |
| c | -1.57629 | 0.8526   | -1.03159 | 0.146218  |
| c | -3.49293 | 2.08195  | -2.36235 | 0.317542  |
| c | -1.69418 | 1.6145   | 0.13368  | -0.244634 |
| h | -2.44923 | 2.39226  | 0.14761  | 0.179775  |
| c | -2.2052  | 3.25108  | 2.72291  | 0.162817  |
| h | -3.16274 | 2.82185  | 2.4043   | -0.038193 |
| h | -2.30874 | 3.48686  | 3.78808  | 0.015088  |
| h | -3.67111 | 2.29345  | -3.42449 | -0.025121 |
| h | -3.17142 | 3.01872  | -1.89409 | -0.090721 |
| c | -4.84784 | 1.64506  | -1.7067  | -0.254952 |
| h | -5.23393 | 0.74966  | -2.19962 | 0.092558  |
| h | -4.67091 | 1.408    | -0.65133 | 0.045143  |
| c | -1.98076 | 4.5919   | 1.93387  | -0.230560 |
| h | -1.24791 | 4.42136  | 1.13631  | 0.040540  |
| h | -1.59215 | 5.37502  | 2.59049  | 0.078745  |
| c | -3.2529  | 5.10624  | 1.28091  | 0.787807  |
| o | -3.80168 | 6.20027  | 1.48935  | -0.617649 |
| o | -3.74148 | 4.17792  | 0.38514  | -0.625755 |
| h | -4.58657 | 4.38415  | -0.10665 | 0.501438  |
| c | -5.88048 | 2.74184  | -1.78836 | 0.911175  |
| o | -5.82345 | 3.86579  | -1.24158 | -0.683216 |
| o | -6.96074 | 2.41578  | -2.58208 | -0.754158 |
| h | -7.60461 | 3.16123  | -2.62629 | 0.508753  |
| c | 4.5705   | 4.35437  | -1.55172 | 0.279026  |
| h | 3.56024  | 4.76615  | -1.44536 | 0.035184  |
| c | 5.56432  | 5.44379  | -1.12956 | 0.781666  |
| c | 4.69798  | 3.13329  | -0.58823 | -0.238038 |
| h | 5.69745  | 2.69137  | -0.72927 | 0.085301  |
| h | 4.64369  | 3.48569  | 0.44631  | 0.111538  |
| n | 4.76931  | 3.94018  | -2.95634 | -0.805407 |
| h | 5.74758  | 3.7194   | -3.15254 | 0.333849  |
| h | 4.43652  | 4.6363   | -3.62381 | 0.325037  |
| o | 5.20174  | 6.02975  | 0.07048  | -0.766814 |
| h | 5.85096  | 6.71521  | 0.35054  | 0.515249  |
| o | 6.58619  | 5.77032  | -1.75085 | -0.602049 |
| c | 3.62483  | 2.10708  | -0.8119  | 0.164235  |
| n | 3.23221  | 1.70558  | -2.09293 | -0.225689 |
| c | 2.86928  | 1.34332  | 0.06312  | -0.104087 |
| c | 2.2687   | 0.7386   | -1.96507 | 0.192939  |
| h | 1.77547  | 0.25396  | -2.78966 | 0.033387  |
| n | 2.03259  | 0.49586  | -0.66833 | -0.467867 |
| h | 2.87114  | 1.34048  | 1.13979  | 0.077965  |
| h | 3.60271  | 2.17023  | -2.92267 | 0.240630  |
| c | -0.55038 | -4.17764 | 0.54307  | 0.053876  |
| h | 0.49527  | -4.40769 | 0.75439  | 0.047830  |
| h | -0.7176  | -4.1916  | -0.53636 | -0.015793 |
| h | -1.20187 | -4.89163 | 1.05342  | 0.041554  |

|   |          |          |          |           |
|---|----------|----------|----------|-----------|
| s | -0.85614 | -2.44012 | 1.20776  | -0.488850 |
| c | -2.60849 | -2.14278 | 0.54851  | 0.404992  |
| h | -2.60197 | -2.37941 | -0.52106 | -0.059773 |
| h | -2.77774 | -1.07174 | 0.66266  | -0.018419 |
| c | -3.66705 | -2.95241 | 1.30937  | -0.176561 |
| h | -3.49766 | -4.02788 | 1.18249  | 0.084624  |
| h | -3.59835 | -2.73057 | 2.38447  | 0.057390  |
| c | -5.10643 | -2.62253 | 0.81347  | 0.159175  |
| h | -5.14376 | -2.80828 | -0.26789 | 0.076035  |
| n | -5.44526 | -1.22137 | 1.06731  | -1.017787 |
| c | -6.09612 | -3.60393 | 1.46428  | 0.853244  |
| o | -6.93312 | -3.33387 | 2.33754  | -0.621712 |
| o | -5.95281 | -4.88988 | 0.95508  | -0.800133 |
| h | -6.57875 | -5.51456 | 1.38831  | 0.512447  |
| h | -5.39698 | -0.96822 | 2.05309  | 0.413090  |
| h | -6.33039 | -0.92809 | 0.65913  | 0.392918  |



**Table S6.** Cartesian coordinates (Å) and the atomic ChelpG charges describing the optimized structure of cyt  $c_4$  heme group in the reduced state ( $m_s = 4$ ).

| atom | $x$      | $y$      | $z$      | $q$       |
|------|----------|----------|----------|-----------|
| c    | -0.01637 | 3.45663  | 2.49651  | -0.204127 |
| h    | -0.79618 | 2.18916  | 5.47481  | 0.055959  |
| c    | 0.04991  | 2.69365  | 4.98375  | -0.239493 |
| c    | 0.05348  | -0.03727 | 3.46947  | -0.252792 |
| c    | 0.05397  | 1.19337  | 2.81303  | 0.152488  |
| h    | 0.56409  | -4.92742 | -5.20892 | 0.185766  |
| c    | -0.39321 | -5.75409 | 3.86216  | -0.456551 |
| c    | -0.16154 | -5.01799 | 2.74092  | -0.070256 |
| c    | -0.06591 | -2.87785 | 1.29118  | -0.033281 |
| c    | -0.00456 | -2.90912 | -1.20318 | -0.053564 |
| fe   | 0.03     | -0.08845 | 0.01022  | 0.670963  |
| n    | 0.07295  | -1.53335 | -1.41619 | 0.083125  |
| n    | 0.1195   | 1.32282  | -1.43232 | -0.131149 |
| n    | 0.04078  | 1.35876  | 1.42944  | -0.205181 |
| n    | 0.00215  | -1.50366 | 1.47021  | -0.132667 |
| c    | -0.08075 | -3.52392 | 0.0512   | -0.159731 |
| h    | -0.14148 | -4.60702 | 0.05874  | 0.102379  |
| c    | -0.09979 | -3.56616 | 2.59154  | 0.006617  |
| h    | -0.00139 | -5.58463 | 1.82188  | 0.128442  |
| h    | -0.40046 | -6.84158 | 3.81579  | 0.139866  |
| h    | -0.5943  | -5.31087 | 4.83218  | 0.184651  |
| c    | -0.03842 | -2.56683 | 3.56249  | -0.041730 |
| c    | -0.01043 | -2.73134 | 5.05932  | -0.039042 |
| h    | 0.28749  | -1.80679 | 5.56552  | 0.014979  |
| h    | 0.69908  | -3.51704 | 5.35529  | 0.026829  |
| h    | -0.99582 | -3.0211  | 5.45699  | 0.020738  |
| c    | 0.01589  | -1.29673 | 2.8495   | 0.092022  |
| c    | 0.16344  | -1.3621  | -2.78738 | -0.068674 |
| c    | 0.0338   | -3.62917 | -2.47188 | -0.032452 |
| c    | -0.05772 | -5.1233  | -2.63531 | 0.021893  |
| h    | -0.39201 | -5.61548 | -1.7154  | 0.004547  |
| h    | 0.91338  | -5.5641  | -2.91053 | 0.015563  |
| h    | -0.76856 | -5.38786 | -3.43101 | -0.002819 |
| c    | 0.15019  | -2.66529 | -3.47176 | 0.013926  |
| c    | 0.22296  | -2.8181  | -4.92267 | -0.034614 |
| h    | 0.11414  | -1.89298 | -5.49103 | 0.105280  |
| c    | 0.41149  | -3.95022 | -5.65524 | -0.471599 |
| h    | 0.43584  | -3.90462 | -6.7423  | 0.145651  |
| c    | 0.2436   | -0.1203  | -3.43345 | -0.213556 |
| h    | 0.3293   | -0.11811 | -4.5154  | 0.134132  |
| c    | 0.21678  | 1.12477  | -2.80517 | 0.084747  |
| c    | 0.08447  | 2.70044  | -1.25484 | 0.146470  |
| c    | 0.26238  | 2.41433  | -3.51176 | -0.017178 |
| c    | 0.17593  | 3.39752  | -2.54862 | -0.118506 |
| c    | 0.3862   | 2.56781  | -5.00579 | -0.224811 |
| h    | 1.31532  | 2.11659  | -5.38562 | 0.053638  |
| h    | 0.38958  | 3.62573  | -5.29222 | 0.087027  |

|   |          |          |          |           |
|---|----------|----------|----------|-----------|
| h | -0.44922 | 2.08534  | -5.53583 | 0.068003  |
| h | 0.06086  | -0.01343 | 4.55511  | 0.139022  |
| c | 0.02913  | 2.49803  | 3.48914  | -0.000334 |
| h | 0.97061  | 2.29232  | 5.43381  | 0.070972  |
| h | -0.00263 | 3.75731  | 5.24153  | 0.094494  |
| c | -0.00439 | 2.72977  | 1.21854  | 0.110136  |
| c | -0.06139 | 4.96024  | 2.62428  | 0.284019  |
| c | 0.0024   | 3.35932  | -0.02795 | -0.229390 |
| h | -0.0333  | 4.44765  | -0.04875 | 0.203822  |
| c | 0.2077   | 4.90022  | -2.69098 | 0.113266  |
| h | 0.979    | 5.30159  | -2.02126 | -0.040794 |
| h | 0.50342  | 5.16749  | -3.71405 | 0.021980  |
| h | -0.3835  | 5.23845  | 3.63662  | -0.018995 |
| h | -0.79527 | 5.37338  | 1.92215  | -0.069649 |
| c | 1.31445  | 5.64312  | 2.33833  | -0.249965 |
| h | 2.07027  | 5.2375   | 3.02117  | 0.045965  |
| h | 1.60508  | 5.42734  | 1.30377  | 0.050195  |
| c | -1.1339  | 5.62783  | -2.33702 | -0.226600 |
| h | -1.82002 | 4.91546  | -1.85601 | 0.019495  |
| h | -1.63238 | 6.00105  | -3.23869 | 0.052657  |
| c | -0.96272 | 6.81721  | -1.35659 | 0.808744  |
| o | -1.56826 | 7.90479  | -1.57791 | -0.720248 |
| o | -0.19014 | 6.54728  | -0.31333 | -0.680021 |
| h | 0.19725  | 7.34759  | 0.74437  | 0.516594  |
| c | 1.24182  | 7.16411  | 2.55433  | 0.871816  |
| o | 0.57819  | 7.86901  | 1.62279  | -0.798973 |
| o | 1.76271  | 7.69734  | 3.56692  | -0.697555 |
| c | -6.32691 | 1.24405  | -1.08688 | 0.296601  |
| h | -5.77172 | 2.18935  | -1.08705 | 0.048307  |
| c | -7.4952  | 1.38382  | -2.07075 | 0.771495  |
| c | -5.36274 | 0.12052  | -1.58807 | -0.246325 |
| h | -5.9025  | -0.83929 | -1.53397 | 0.079390  |
| h | -5.11971 | 0.30001  | -2.64047 | 0.114837  |
| n | -6.79609 | 0.96433  | 0.28652  | -0.817205 |
| h | -7.50211 | 0.22629  | 0.3052   | 0.332375  |
| h | -7.14702 | 1.79533  | 0.76247  | 0.325296  |
| o | -7.09497 | 1.95419  | -3.26635 | -0.766613 |
| h | -7.84403 | 2.02618  | -3.90212 | 0.513563  |
| o | -8.66368 | 1.01708  | -1.86692 | -0.609418 |
| c | -4.08729 | 0.06997  | -0.79783 | 0.161274  |
| n | -4.07413 | 0.12537  | 0.60087  | -0.246826 |
| c | -2.75873 | -0.04249 | -1.17669 | -0.100092 |
| c | -2.76941 | 0.0604   | 1.02153  | 0.232534  |
| h | -2.45422 | 0.10545  | 2.05     | 0.015846  |
| n | -1.9522  | -0.04491 | -0.03512 | -0.500217 |
| h | -2.33447 | -0.10942 | -2.1646  | 0.078604  |
| h | -4.92867 | 0.30218  | 1.12809  | 0.248374  |
| c | 3.23804  | -1.42328 | 1.10393  | 0.085415  |
| h | 2.80889  | -2.37914 | 0.79569  | 0.041245  |
| h | 2.89664  | -1.17984 | 2.11339  | -0.035127 |
| h | 4.33006  | -1.46621 | 1.05587  | 0.026604  |
| s | 2.59118  | -0.13259 | -0.11188 | -0.524833 |

|   |         |         |          |           |
|---|---------|---------|----------|-----------|
| c | 3.20316 | 1.45126 | 0.72749  | 0.491335  |
| h | 2.84302 | 1.42746 | 1.76176  | -0.067625 |
| h | 2.69604 | 2.26218 | 0.20157  | -0.067390 |
| c | 4.72358 | 1.64131 | 0.65866  | -0.199793 |
| h | 5.24488 | 0.85894 | 1.22669  | 0.064552  |
| h | 5.06096 | 1.58554 | -0.3864  | 0.068251  |
| c | 5.11265 | 3.04117 | 1.24092  | 0.164231  |
| h | 4.69951 | 3.10906 | 2.25497  | 0.070617  |
| n | 4.56828 | 4.12599 | 0.43769  | -0.966693 |
| c | 6.64162 | 3.10196 | 1.37143  | 0.844726  |
| o | 7.42775 | 3.68464 | 0.60979  | -0.623516 |
| o | 7.09893 | 2.37055 | 2.4682   | -0.791776 |
| h | 8.08254 | 2.39927 | 2.51791  | 0.499758  |
| h | 5.03808 | 4.29514 | -0.44732 | 0.394447  |
| h | 4.3065  | 4.97209 | 0.9315   | 0.381190  |
